# Supplementary material for: Large-scale preparation of size-controlled Fe3O4@SiO2 particles for electrophoretic display with non-iridescent structural colors
Source: Royal Society of Chemistry journal article supplement (doi:10.1039/c8ra08352e), 2019-01-01
Supplement: c8ra08352e1.pdf [file c8ra08352e1.pdf]

# Supporting information

## Large-scale Preparation of Size-controlled $\text{Fe}_3\text{O}_4@\text{SiO}_2$ Particles for Electrophoretic Display with Non-iridescent Structural Colors

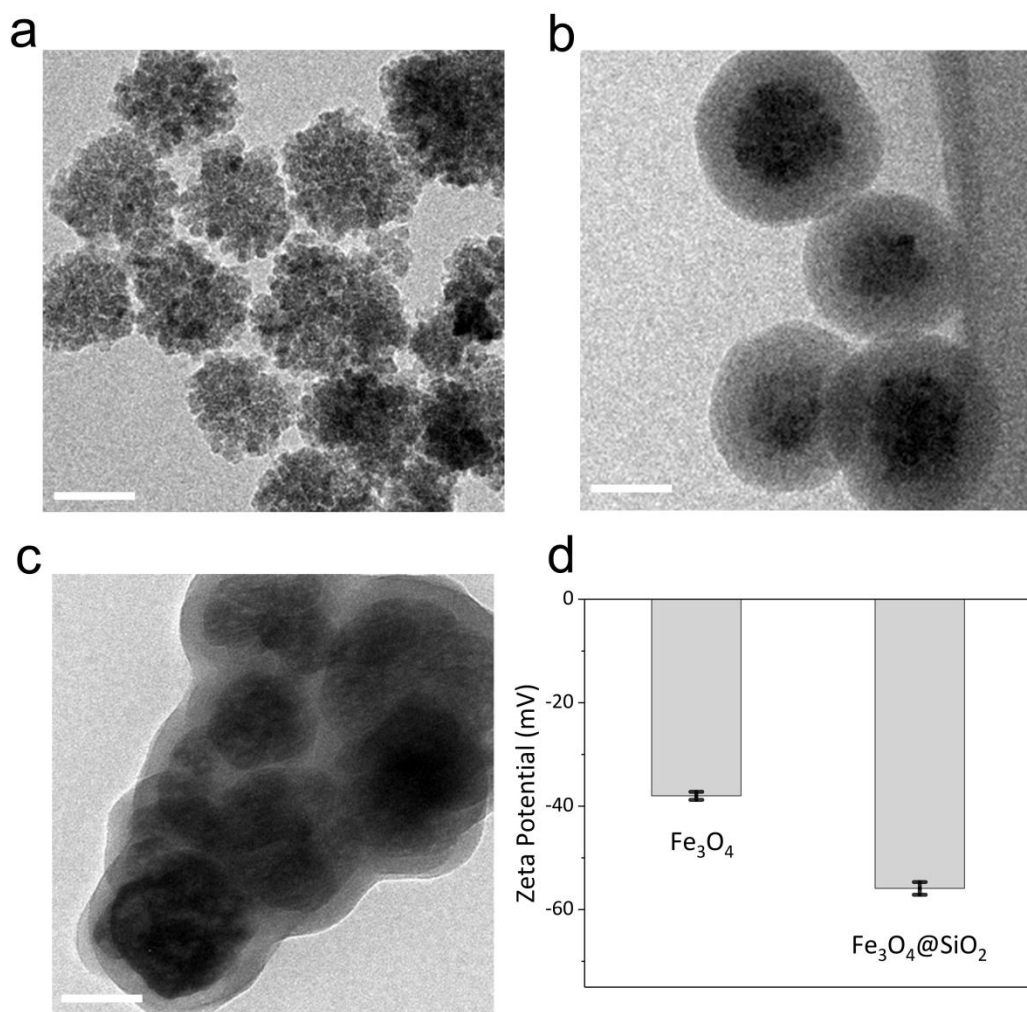

Fig. S1 TEM images of  $\text{Fe}_3\text{O}_4@\text{SiO}_2$  in the modified Stöber method with different reaction temperature for (a) 30 °C, (b) 50 °C, and (c) 80 °C; (d) Zeta potential of  $\text{Fe}_3\text{O}_4$  and  $\text{Fe}_3\text{O}_4@\text{SiO}_2$  particles. The scale bars are 100 nm.

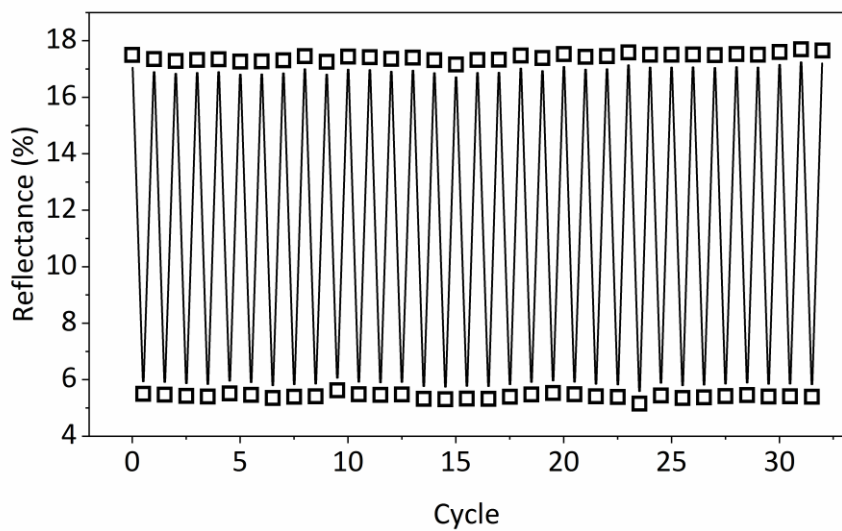

Fig. S2 The display cell under cyclic electric with a 0.5 Hz AC Power.

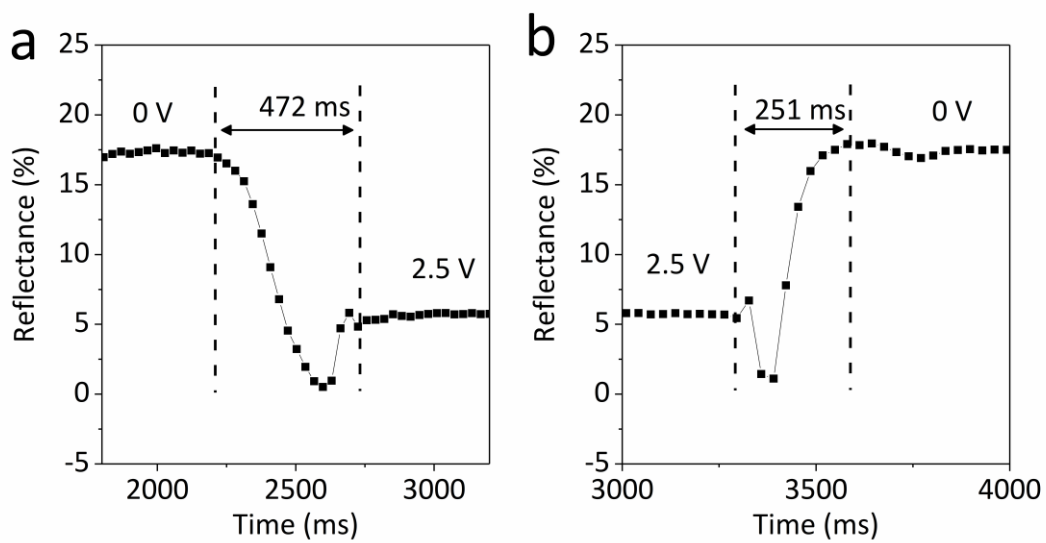

Fig. S3 Response time measurement of a display cell.
